# Supplementary material for: Phosphorus-modified ruthenium–tellurium dendritic nanotubes outperform platinum for alkaline hydrogen evolution
Source: Royal Society of Chemistry journal article supplement (doi:10.1039/d0ta09501j), 2021-01-01
Supplement: d0ta09501j1.pdf [file d0ta09501j1.pdf]

## Electronic Supplementary Information

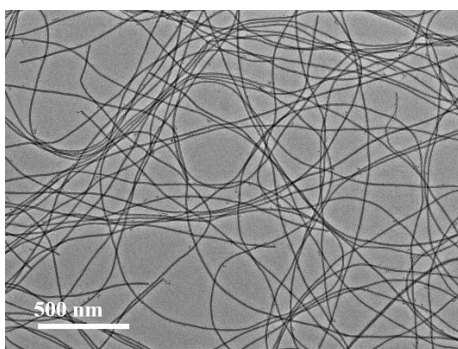

**Fig. S1** TEM image of the Te NWs.

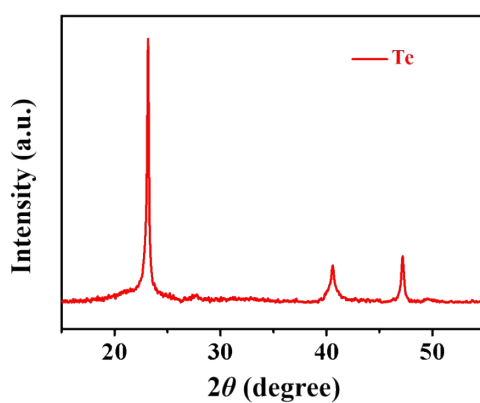

**Fig. S2** XRD pattern of the Te NWs.

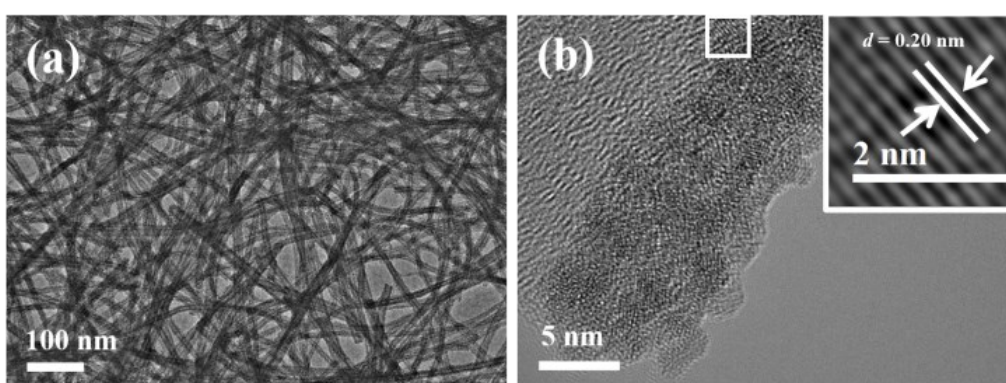

**Fig. S3** (a) TEM and (b) HRTEM images of the RuTe ( $\text{Ru}_{0.40}\text{Te}$ ) NTs. The inset in (b) is the lattice fringes in the square area in (b).

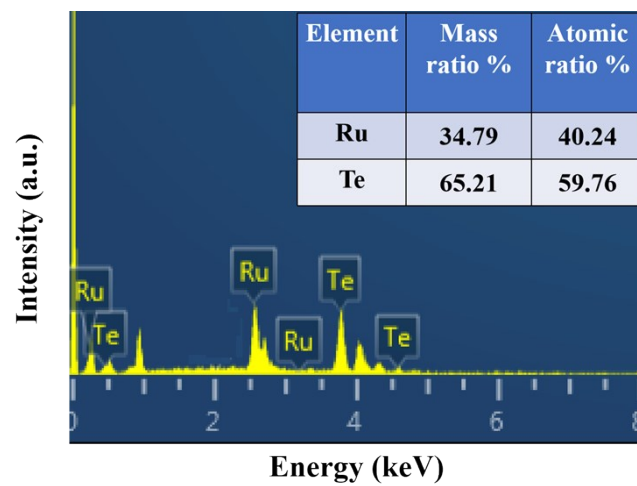

**Fig. S4** EDX spectrum of the RuTe ( $\text{Ru}_{0.40}\text{Te}$ ) NTs.

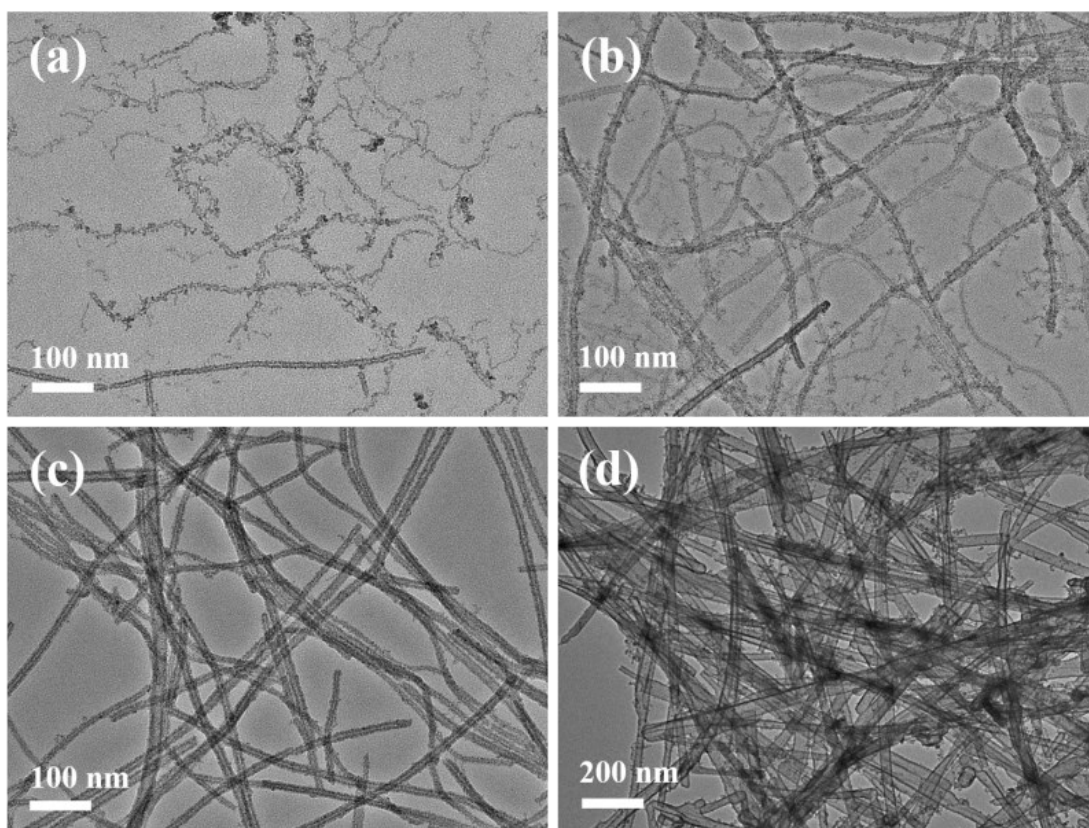

**Fig. S5** TEM images of (a)  $\text{Ru}_{0.07}\text{Te}$  NWs, (b)  $\text{Ru}_{0.17}\text{Te}$  NTs, (c)  $\text{Ru}_{0.28}\text{Te}$  NTs and (d)  $\text{Ru}_{0.62}\text{Te}$  NTs.

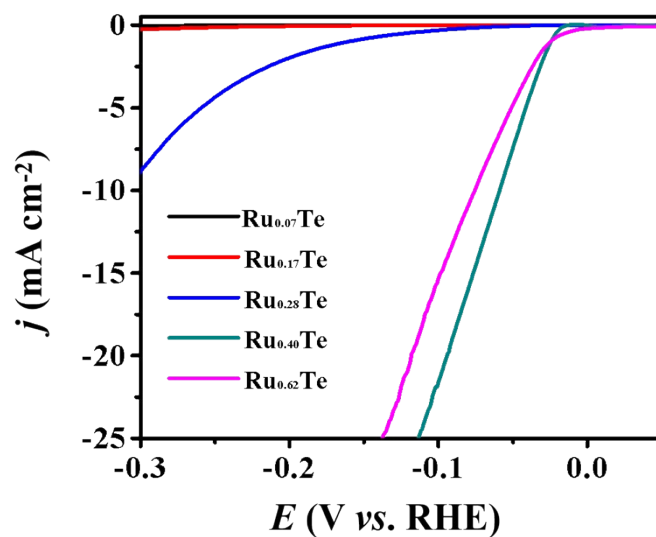

Fig. S6 LSV curves (with iR correction) for various electrodes collected in 1M KOH.

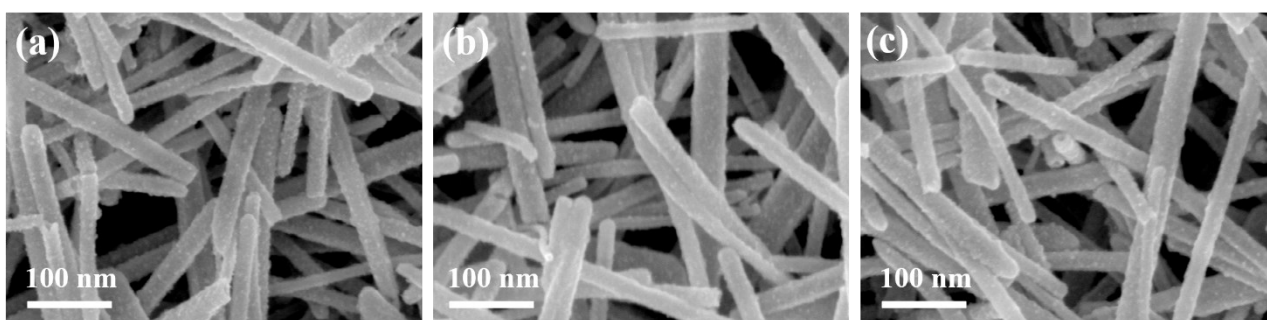

Fig. S7 SEM images of RuTeP samples prepared with different amounts of TOP under the typical synthesis: (a) 0.5 mL, (b) 1.0 mL and (c) 2.0 mL.

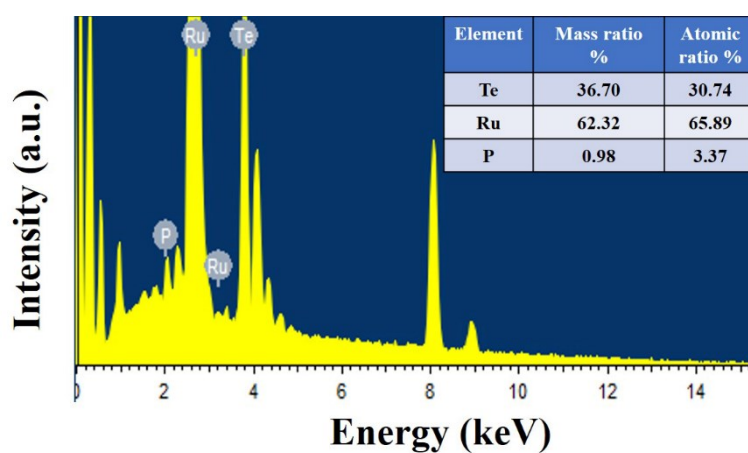

Fig. S8 EDX spectrum of the typical RuTeP NTs.

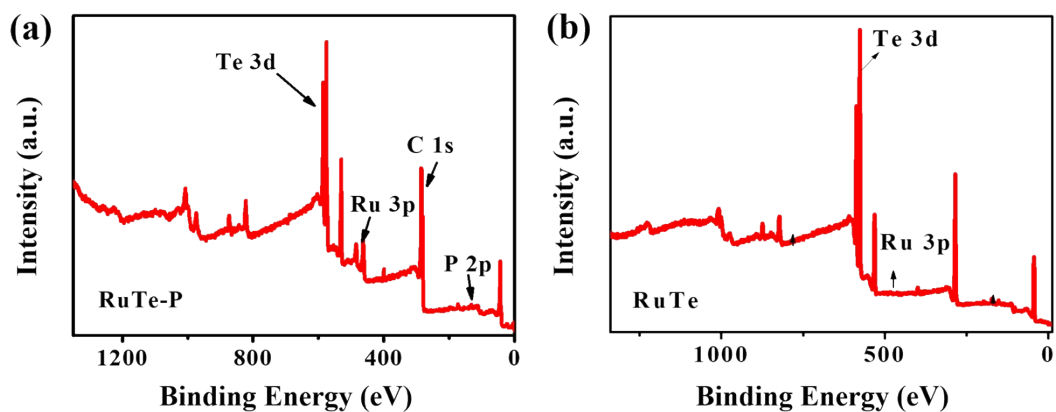

**Fig. S9** The XPS survey spectra of the RuTeP NTs (a) and RuTe NTs (b).

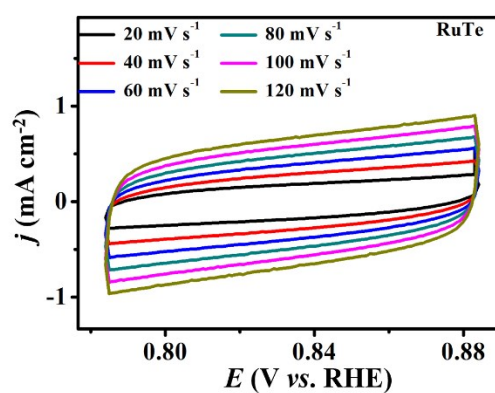

**Fig. S10** Typical cyclic voltammogram (CV) curves of RuTe NTs with different scan rates.

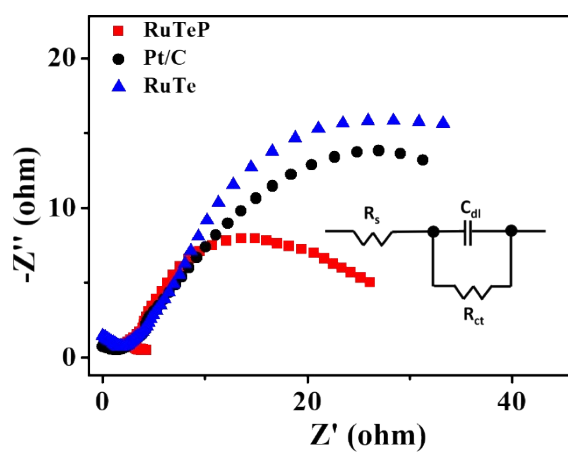

**Fig. S11** Electrochemical impedance spectra of various catalysts in 1.0 M KOH under applied potentials of -0.035 V (vs. RHE).

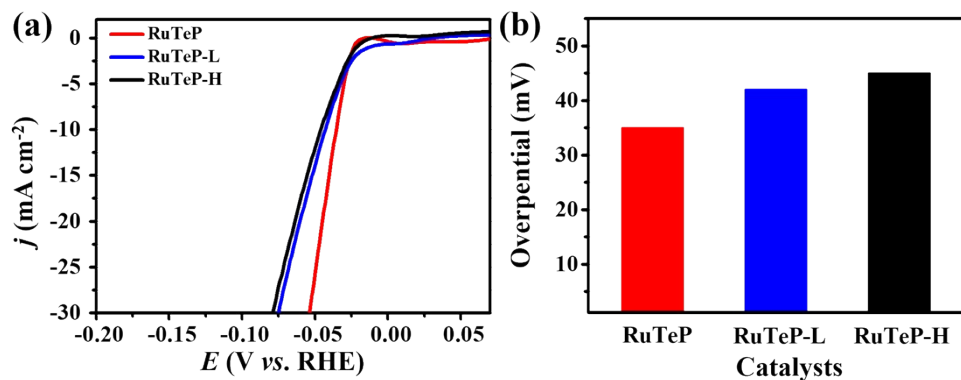

**Fig. S12** (a) HER polarization curves of different phosphorous content catalysts in 1.0 M KOH. (b) Comparison of the overpotentials at  $-10 \text{ mA cm}^{-2}$ .

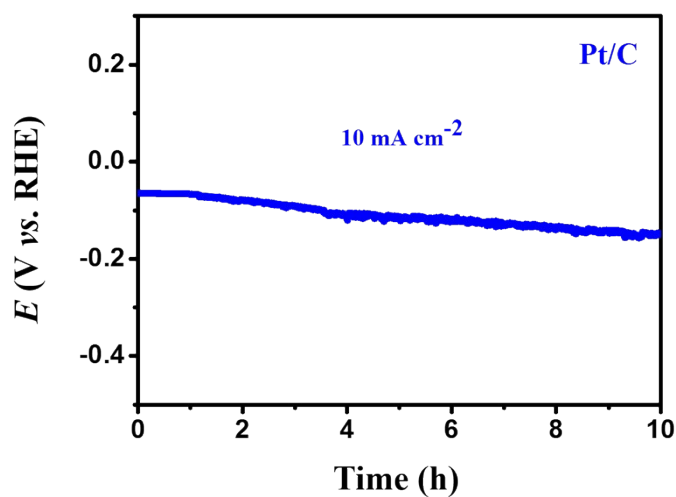

**Fig. S13** The chronopotentiometric curve of Pt/C catalyst with constant cathode-current density of  $10 \text{ mA cm}^{-2}$  for 10 h.

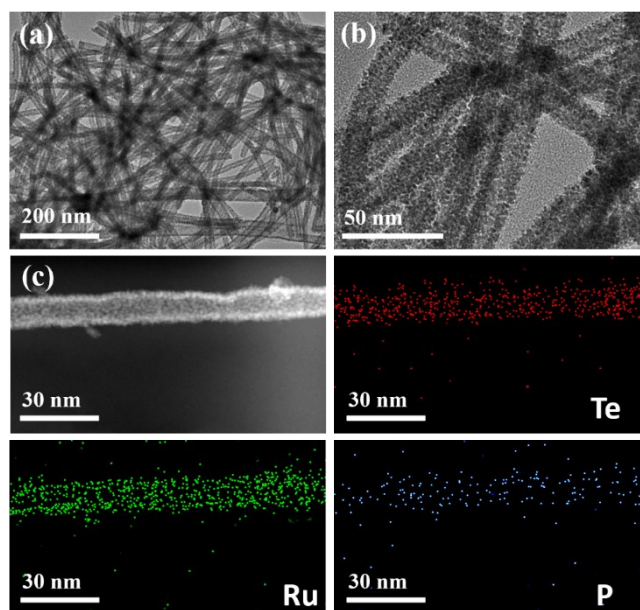

**Fig. S14** (a, b) TEM and (c) HAADF-STEM and elemental mapping images of the RuTeP NTs after catalytic stability testing.

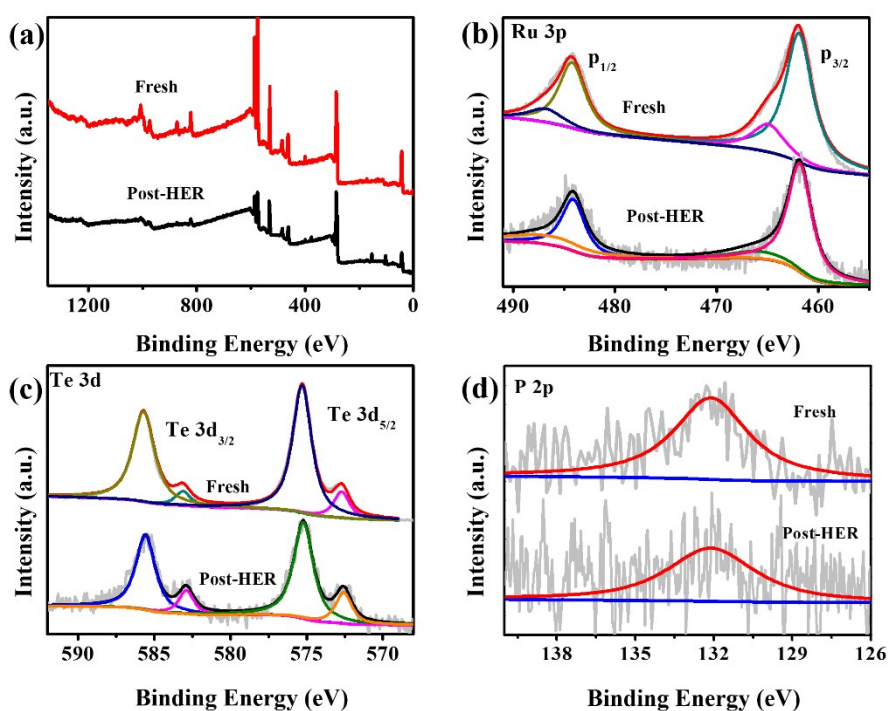

**Fig. S15** (a) The XPS survey spectrum of the RuTeP NTs before and after catalytic stability testing. (b-d) XPS spectra of the Ru 3p, Te 3d and P 2p for the RuTeP NTs before and after catalytic stability testing.

**Table S1.** Mass ratio and atomic ratio of different elements in various RuTe samples by EDX analysis.

| <b>Catalysts</b>      | <b>Element</b> | <b>Mass ratio %</b> | <b>Atomic ratio %</b> |
|-----------------------|----------------|---------------------|-----------------------|
| Ru <sub>0.07</sub> Te | Ru             | 5.99                | 7.44                  |
|                       | Te             | 94.01               | 92.56                 |
| Ru <sub>0.17</sub> Te | Ru             | 14.10               | 17.16                 |
|                       | Te             | 85.90               | 82.84                 |
| Ru <sub>0.28</sub> Te | Ru             | 23.82               | 28.31                 |
|                       | Te             | 76.18               | 71.69                 |
| Ru <sub>0.40</sub> Te | Ru             | 34.79               | 40.24                 |
|                       | Te             | 65.21               | 59.76                 |
| Ru <sub>0.62</sub> Te | Ru             | 56.86               | 62.46                 |
|                       | Te             | 43.14               | 37.54                 |

**Table S2.** Atomic ratio of different elements in various RuTeP samples by EDX analysis.

| <b>Catalysts</b> | <b>Adding TOP amount</b> | <b>Atomic ratio %</b>           |
|------------------|--------------------------|---------------------------------|
| RuTeP-L          | 0.5 mL                   | Ru 66.78% : Te 31.35% : P 1.87% |
| RuTeP            | 1 mL                     | Ru 65.89% : Te 30.74% : P 3.37% |
| RuTeP-H          | 2 mL                     | Ru 61.15% : Te 33.95% : P 4.90% |

**Table S3.** Comparison of HER activity for RuTeP NTs and some other reported Ru-based electrocatalysts in 1 M KOH electrolyte.

| Catalysts                           | Electrode substrates   | $\eta_{10}$<br>(mV) | Tafel slope<br>(mVdec <sup>-1</sup> ) | References       |
|-------------------------------------|------------------------|---------------------|---------------------------------------|------------------|
| <b>RuTeP</b>                        | <b>GCE<sup>a</sup></b> | <b>35</b>           | <b>30.8</b>                           | <b>This work</b> |
| Ru-Ru <sub>2</sub> P@PC             | GCE                    | 43.4                | 35.1                                  | 1                |
| Ru/C <sub>3</sub> N <sub>4</sub> /C | GC-RDE <sup>b</sup>    | 79                  | /                                     | 2                |
| RuP <sub>2</sub> /NPC               | GCE                    | 52                  | 69                                    | 3                |
| Ru/CN                               | GCE                    | 50                  | /                                     | 4                |
| Ru <sub>2</sub> P/PNC@CC            | Graphite plate         | 50                  | 52                                    | 5                |
| Ru <sub>2</sub> P                   | GCE                    | 54                  | 29                                    | 6                |
| Ru <sub>x</sub> P/NPC               | GCE                    | 154                 | 114                                   | 7                |
| Ru-NGC                              | GCE                    | around 50           | 40                                    | 8                |
| Ni@Ni <sub>2</sub> P-Ru             | GCE                    | 51                  | 35                                    | 9                |
| HNRs                                |                        |                     |                                       |                  |
| RuP/NPC                             | GCE                    | 74                  | 70                                    | 10               |

<sup>a</sup>Glassy carbon electrode; <sup>b</sup>Glassy carbon rotating disk electrode.



## Reference

- [1] Z. Liu, Z. Li, J. Li, J. Xiong, S. Zhou, J. Liang, W. Cai, C. Wang, Z. Yang and H. Cheng, *J. Mater. Chem. A*, 2019, **7**, 5621-5625.
- [2] Y. Zheng, Y. Jiao, Y. Zhu, L. H. Li, Y. Han, Y. Chen, M. Jaroniec and S.-Z. Qiao, *J. Am. Chem. Soc.*, 2016, **138**, 16174-16181.
- [3] Z. Pu, I. S. Amiinu, Z. Kou, W. Li and S. Mu, *Angew. Chem.-Int. Edit.*, 2017, **56**, 11559-11564.
- [4] J. Wang, Z. Wei, S. Mao, H. Li and Y. Wang, *Energy Environ. Sci.*, 2018, **11**, 800-806.
- [5] T. Liu, B. Feng, X. Wu, Y. Niu, W. Hu and C. M. Li, *ACS Appl. Energy Mater.*, 2018, **1**, 3143-3150.
- [6] Y. Wang, Z. Liu, H. Liu, N.-T. Suen, X. Yu and L. Feng, *Chemsuschem*, 2018, **11**, 2724-2729.
- [7] Q. Qin, H. Jang, L. Chen, G. Nam, X. Liu and J. Cho, *Adv. Energy Mater.*, 2018, **8**, 1801478.
- [8] Q. Song, X. Qiao, L. Liu, Z. Xue, C. Huang and T. Wang, *Chem. Commun.*, 2019, **55**, 965-968.
- [9] Y. Liu, S. L. Liu, Y. Wang, Q. H. Zhang, L. Gu, S. C. Zhao, D. D. Xu, Y. F. Li, J. C. Bao and Z. H. Dai, *J. Am. Chem. Soc.*, 2018, **140**, 2731-2734.
- [10] J.Q. Chi, W.-K. Gao, J.-H. Lin, B. Dong, K.-L. Yan, J.-F. Qin, B. Liu, Y.-M. Chai and C.-G. Liu, *Chemsuschem*, 2018, **11**, 743-752.
